# Supplementary material for: MOF-derived 1D hollow bimetallic iron(iii) oxide nanorods: effects of metal-addition on phase transition, morphology and magnetic properties
Source: Royal Society of Chemistry journal article supplement (doi:10.1039/d0ce01440k), 2020-01-01
Supplement: d0ce01440k1.pdf [file d0ce01440k1.pdf]

Supporting Information for

**MOF-derived 1D hollow bimetallic iron(III) oxide nanorods: Effects of metal-  
addition on the phase transition, morphology and magnetic properties**

Junhyung Lee<sup>a,b\*</sup>

<sup>a</sup>ECA, Korea Advanced Nano Fab Center, 109, Gwanggyo-ro, Yeongtong-gu, Suwon-si,  
Gyeonggi-do, 16229, Korea

<sup>b</sup>Department of Materials Science and Engineering, Seoul National University, 1 Gwanak-ro,  
Gwanak-gu, Seoul 08826, Korea

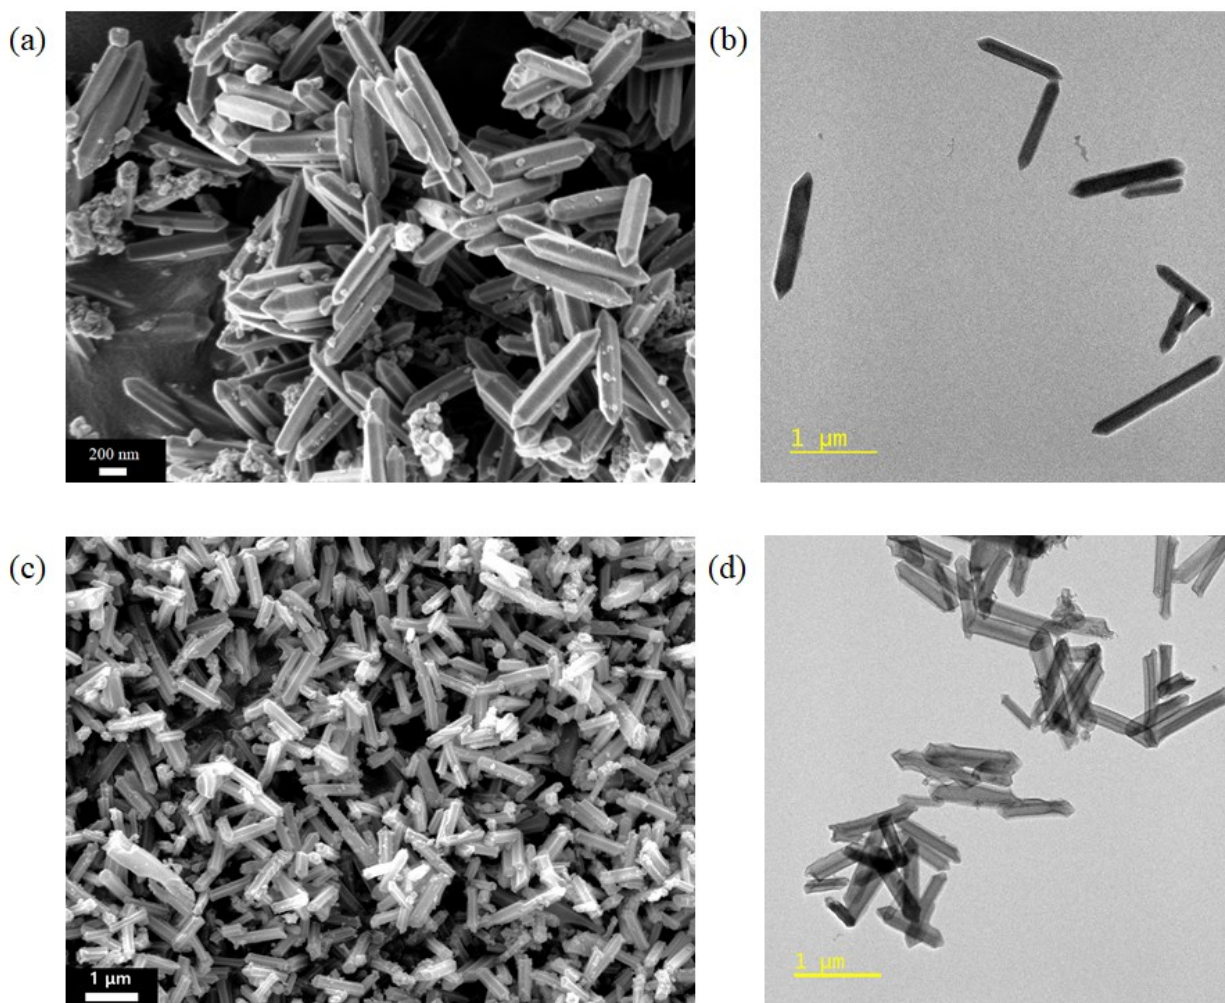

Fig. S1. (a) SEM and (b) TEM images of MIL-88A; (c) SEM and (d) TEM images of MIL-88A etched by NH<sub>4</sub>OH

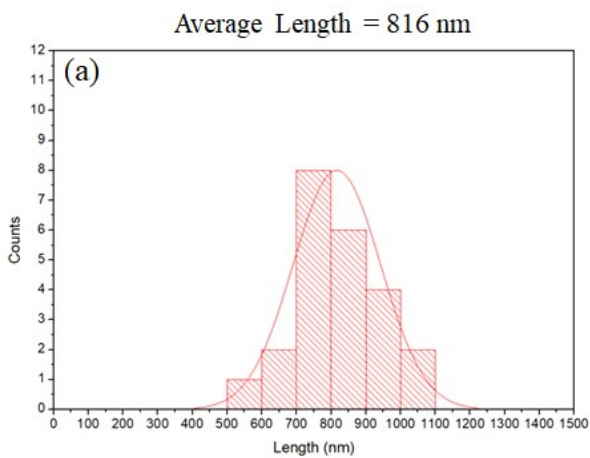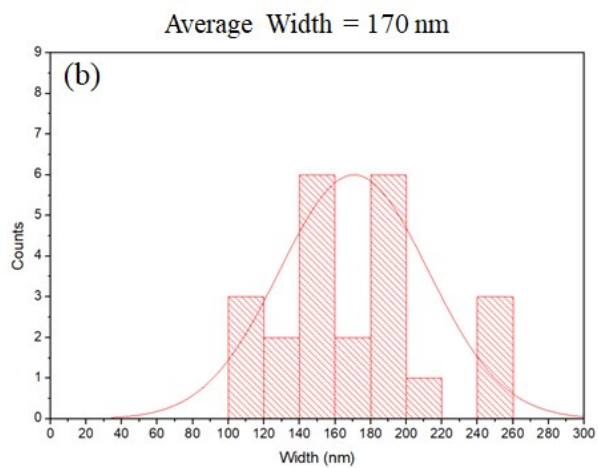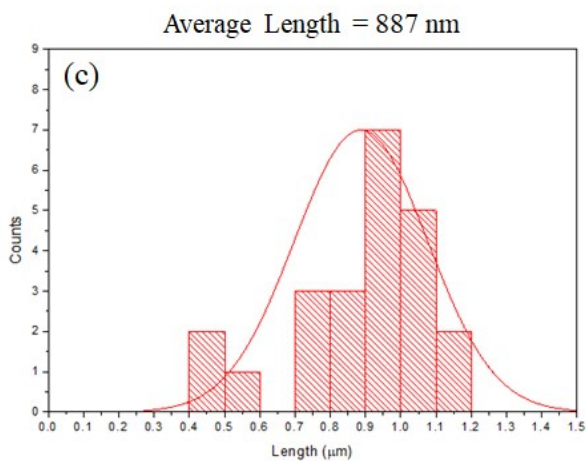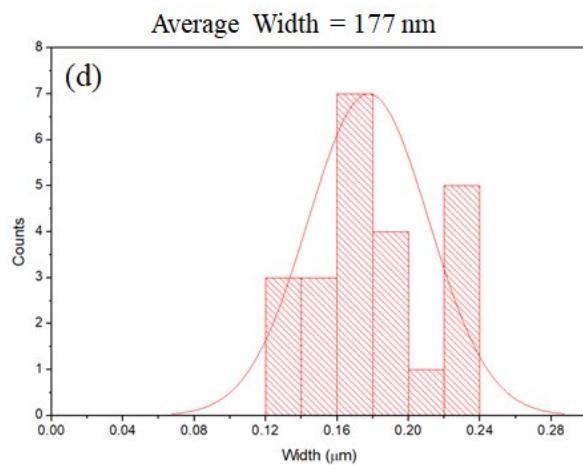

Fig. S1-2. The average length and width of (a, b) Fe-MIL-88A (c, d)  $\text{NH}_4\text{OH-MOF}$

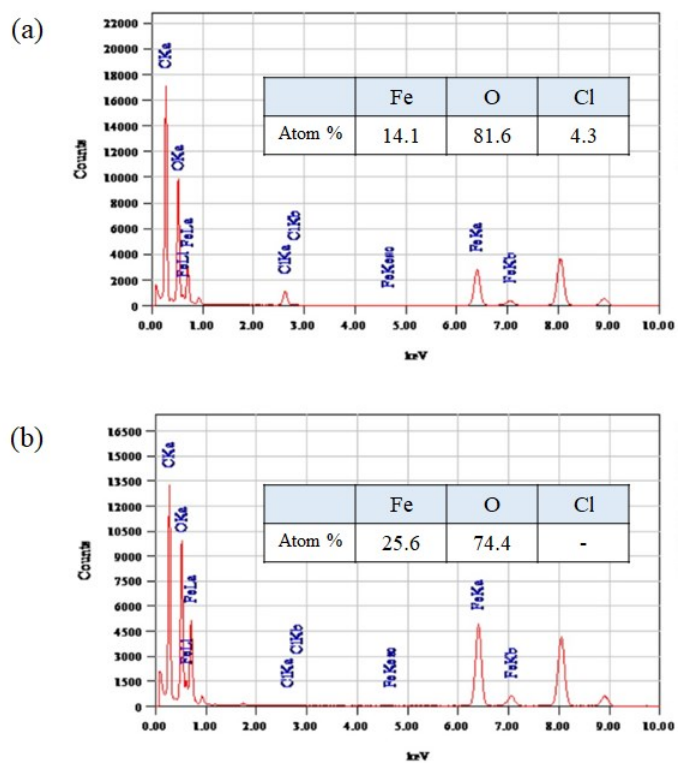

Fig. S2. EDS spectra of (a) Fe-MIL-88A and (b)  $\text{NH}_4\text{OH-MOF}$

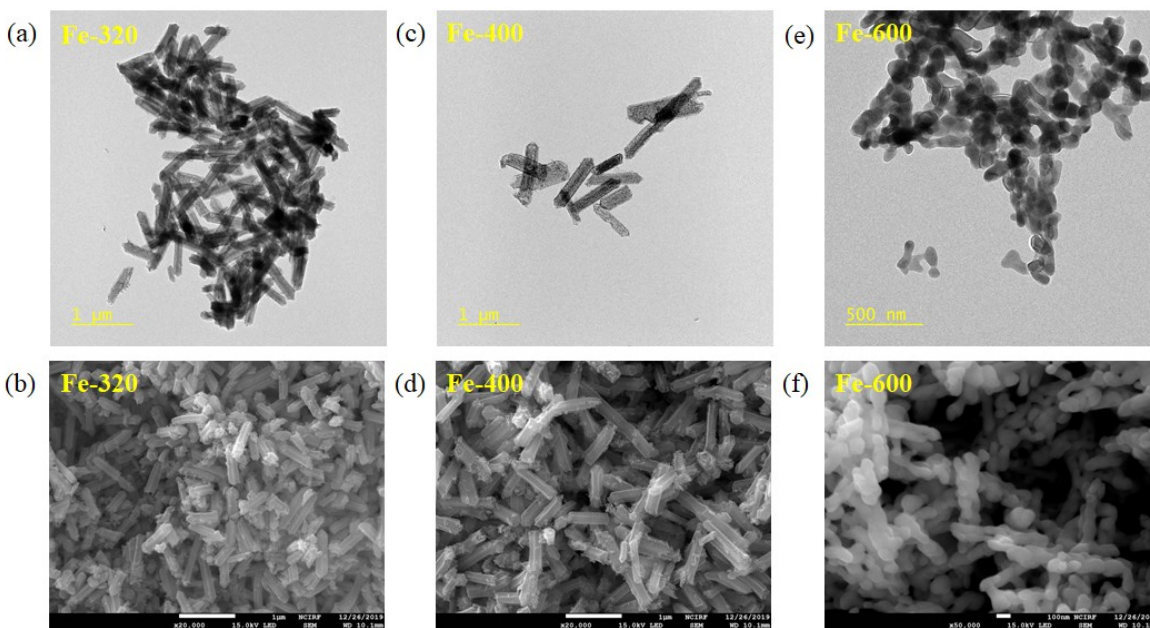

Fig. S3. TEM and SEM images of (a, b) Fe-320 (c, d) Fe-400 (e, f) Fe-600

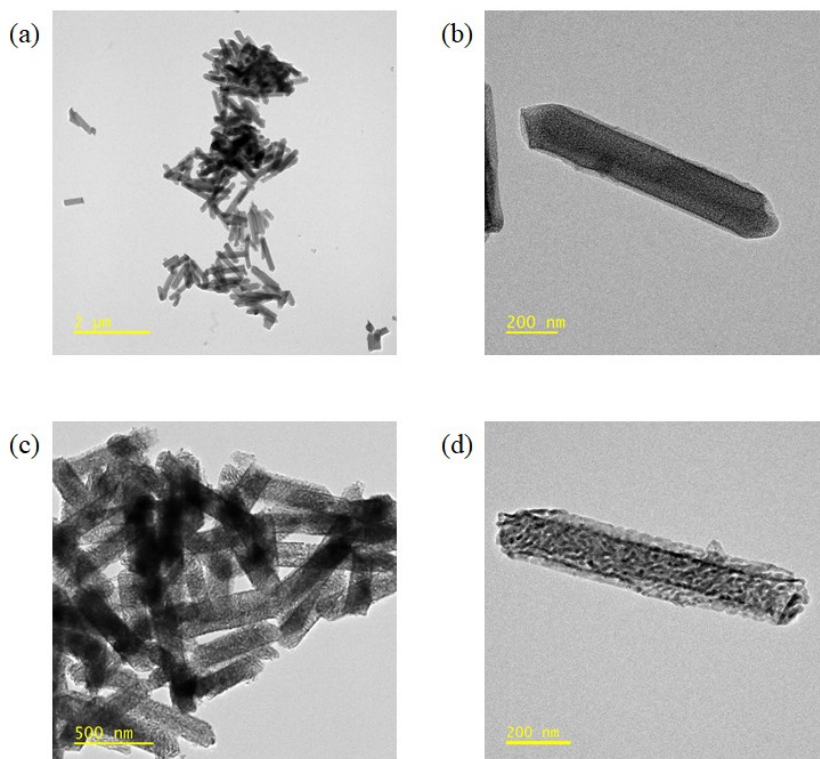

Fig. S4. TEM images of (a, b) MnFe-320 and (c, d) MnFe-400



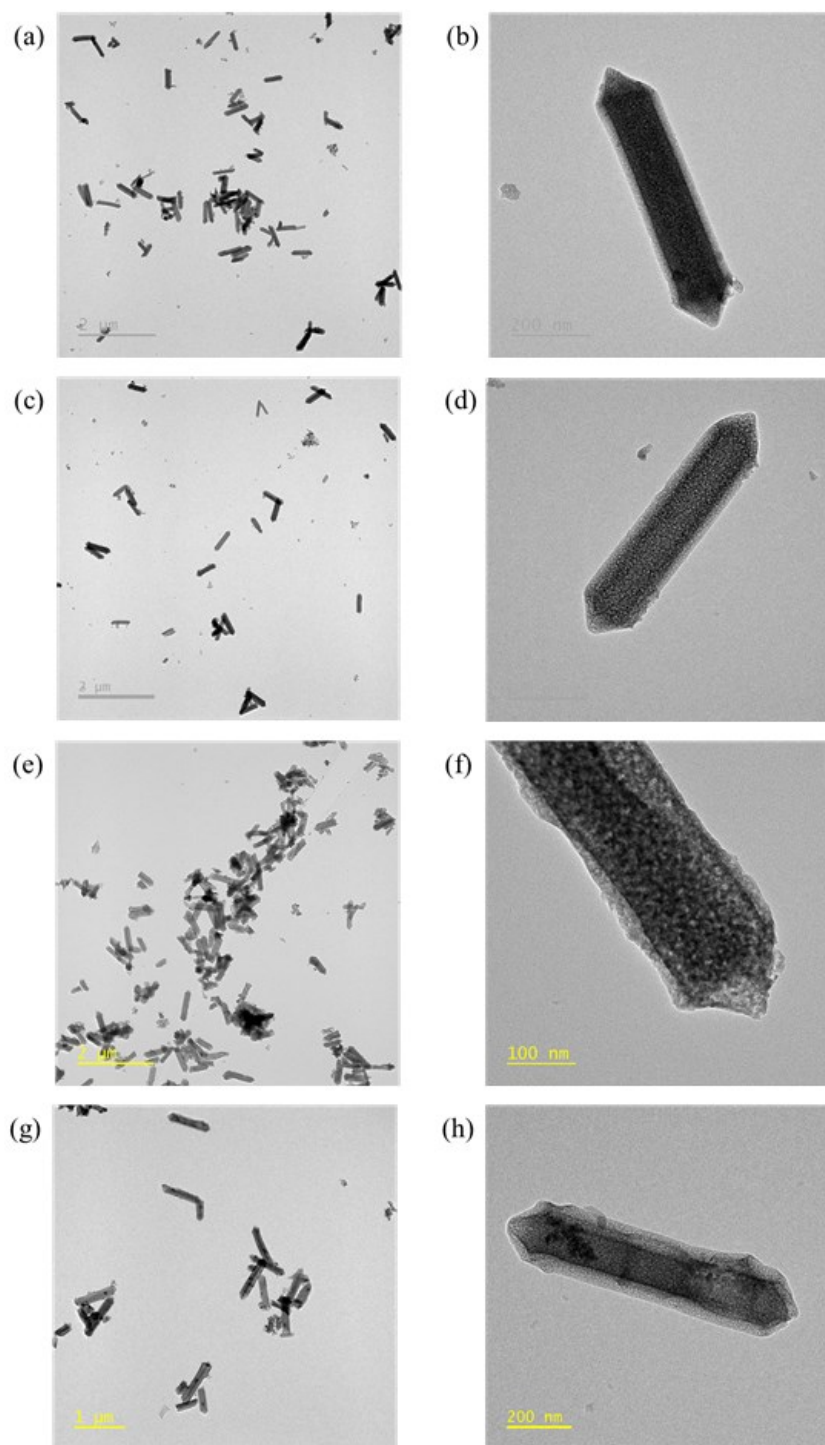

Fig. S5. TEM images of (a, b) NiFe-400 (c, d) LaFe-400 (e, f) RuFe-320 (g, h) AgFe-400

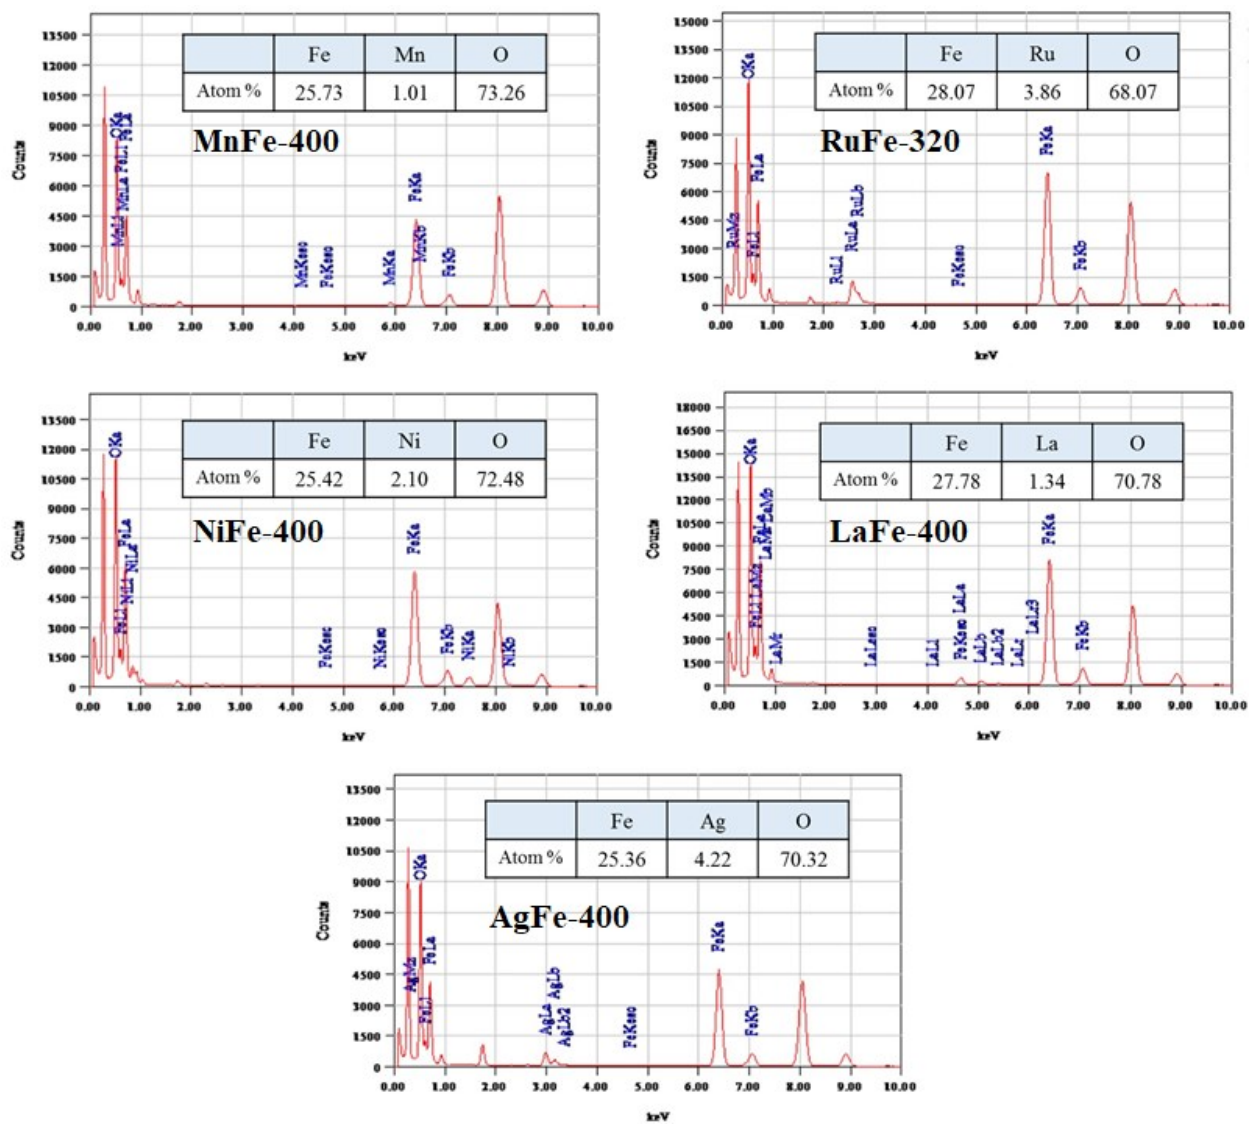

Fig. S6. EDS spectra of prepared 1D hollow bimetallic iron oxide nanorods.

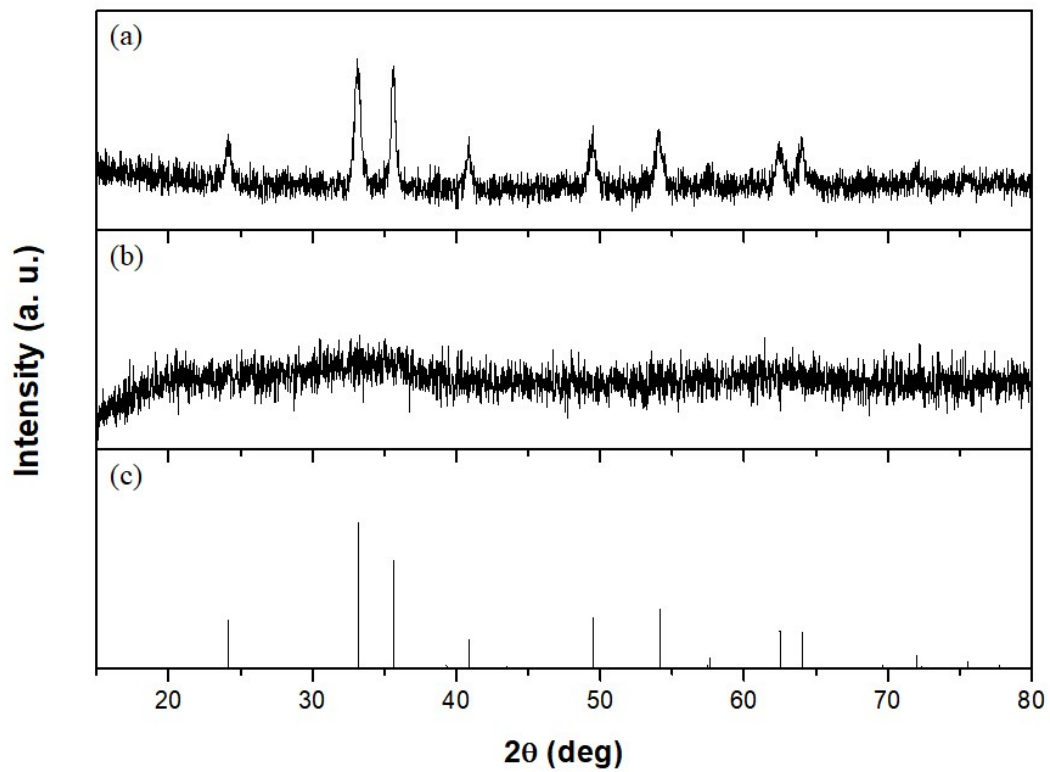

Fig. S7. XRD patterns of (a) MnFe-400 (b) MnFe-320 and (c)  $\alpha$ -Fe<sub>2</sub>O<sub>3</sub> (ICDD No. 04-006-6579)



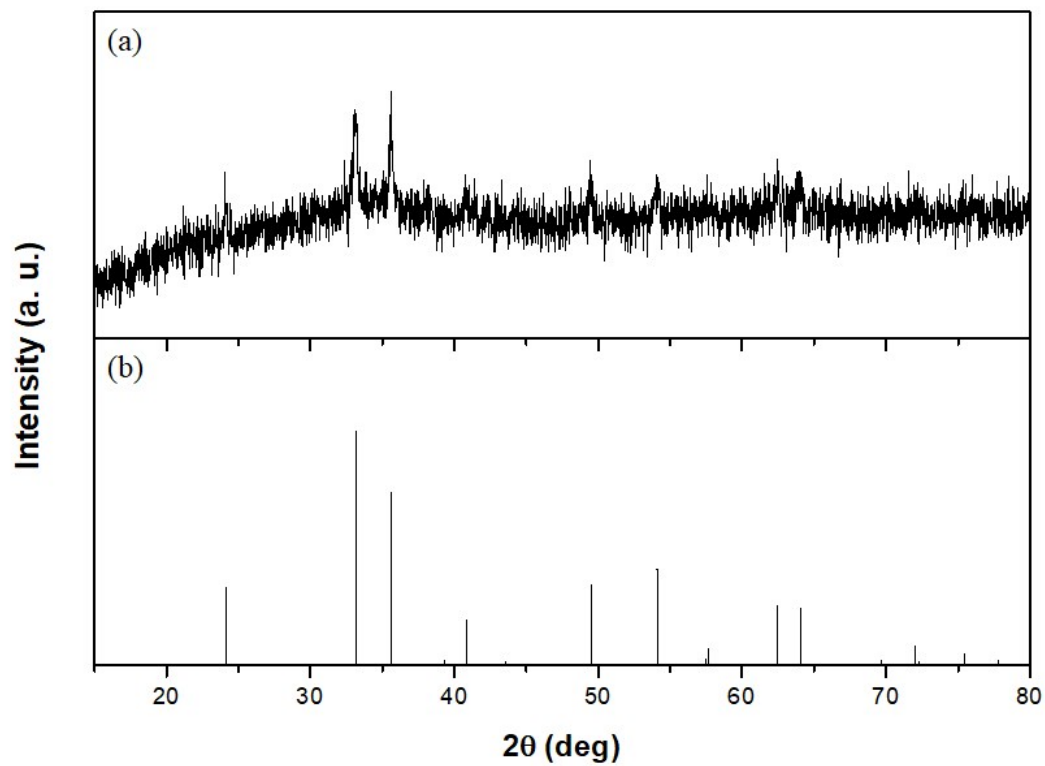

Fig. S8. XRD patterns of (a) AgFe-400 and (b) simulated  $\alpha\text{-Fe}_2\text{O}_3$  (ICDD No. 04-006-6579)

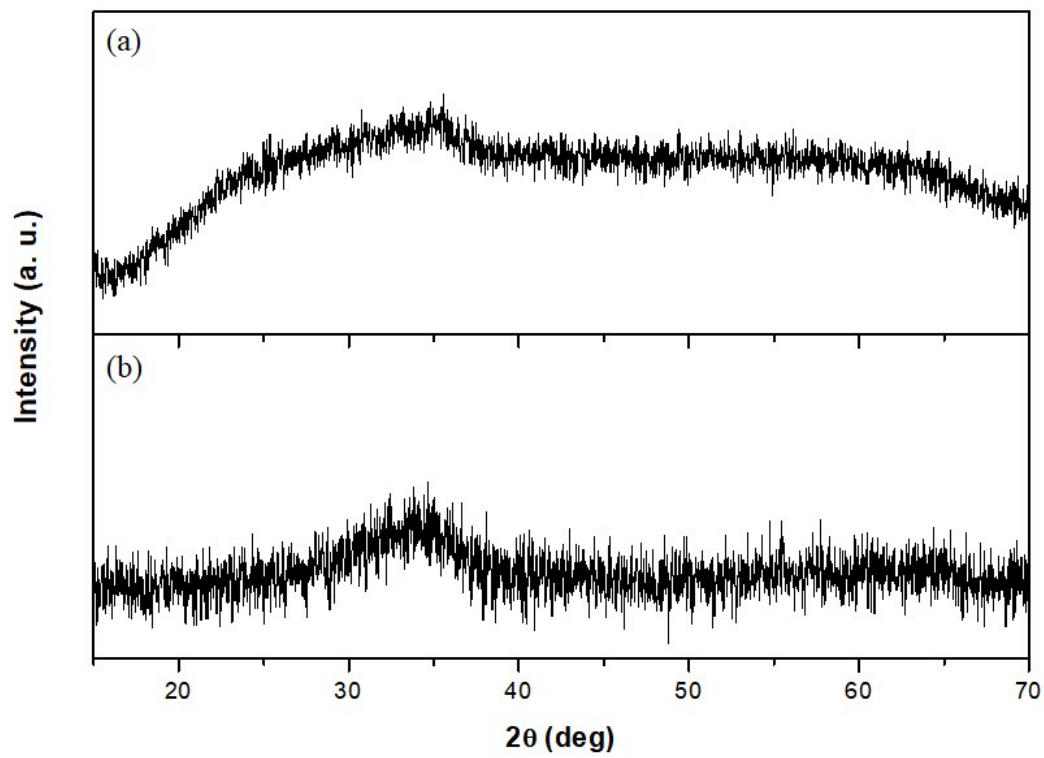

Fig. S9. XRD patterns of (a) LaFe-500 and (b) LaFe-400

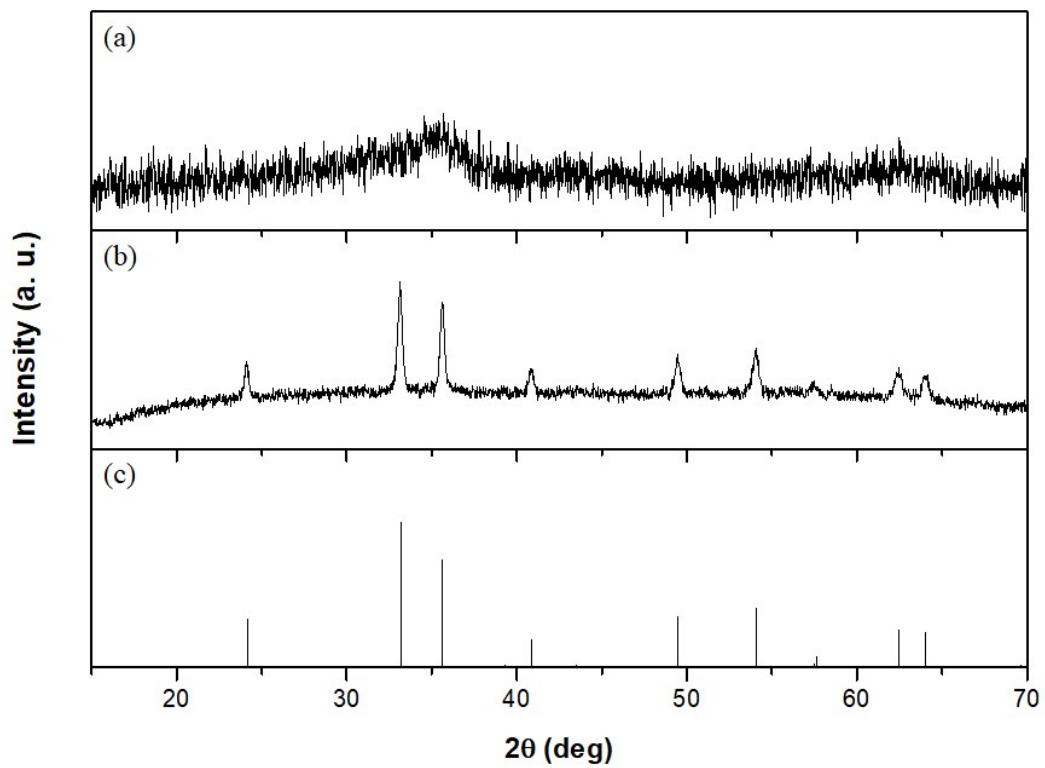

Fig. S10. XRD patterns of (a) NiFe-400 (b) NiFe-500 and (c)  $\alpha$ -Fe<sub>2</sub>O<sub>3</sub> (ICDD No. 04-006-6579)

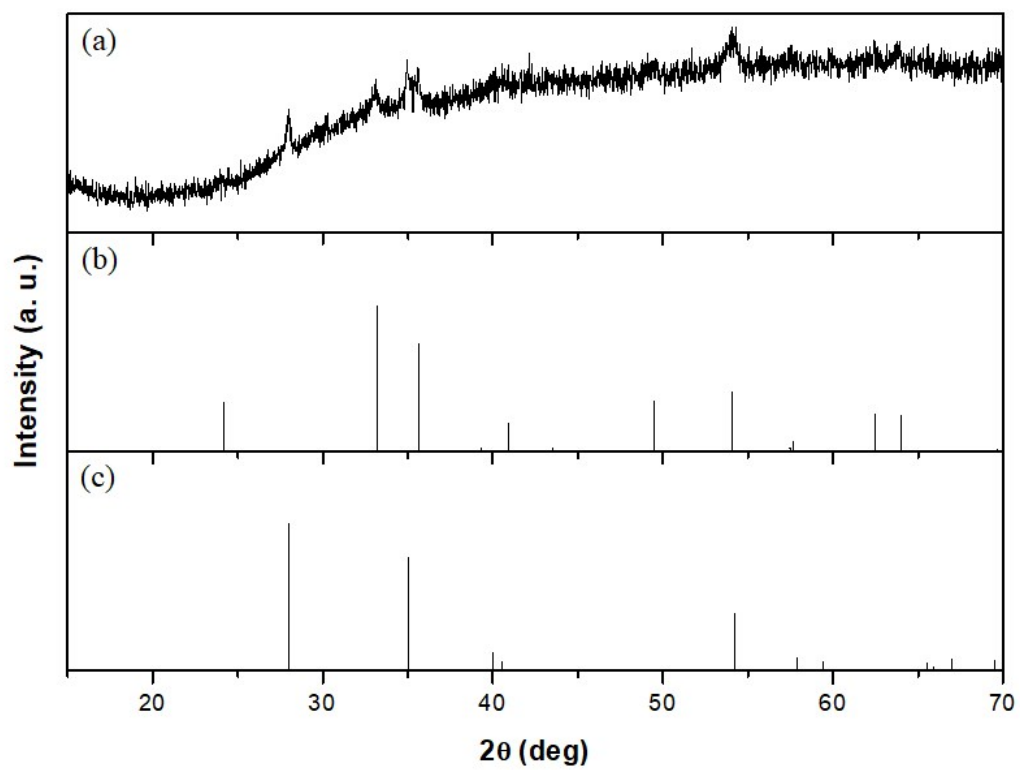

Fig. S11. XRD patterns of (a) RuFe-320 (b)  $\alpha$ -Fe<sub>2</sub>O<sub>3</sub> (ICDD No. 04-006-6579) and (c) RuO<sub>2</sub> (ICDD No. 00-040-1290)

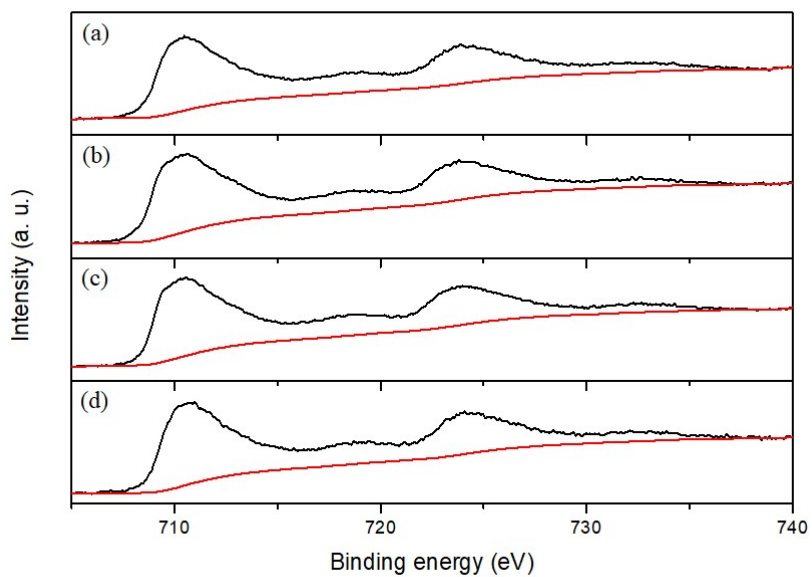

Fig. S12. XPS spectra of Fe 2p for the (a) NiFe-400 (b) RuFe-320 (c) AgFe-400 and (d) LaFe-400

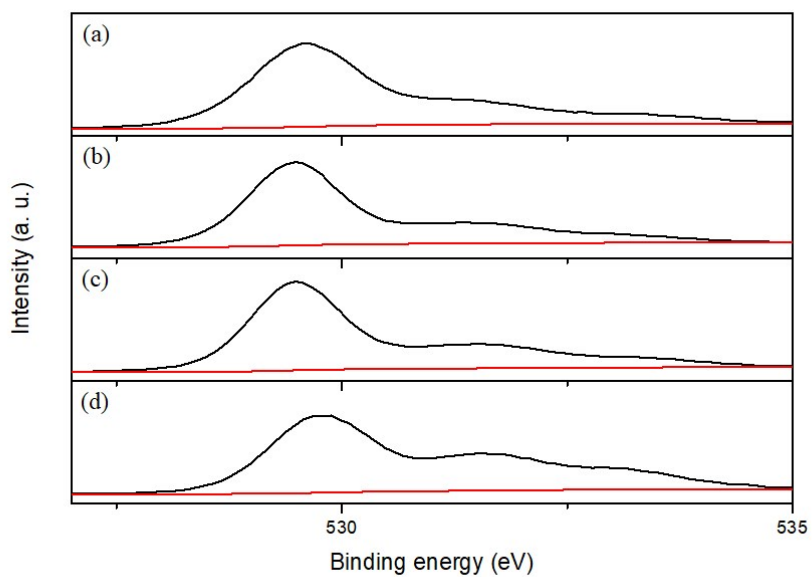

Fig. S13. XPS spectra of O 1s for the (a) NiFe-400 (b) RuFe-320 (c) AgFe-400 and (d) LaFe-400

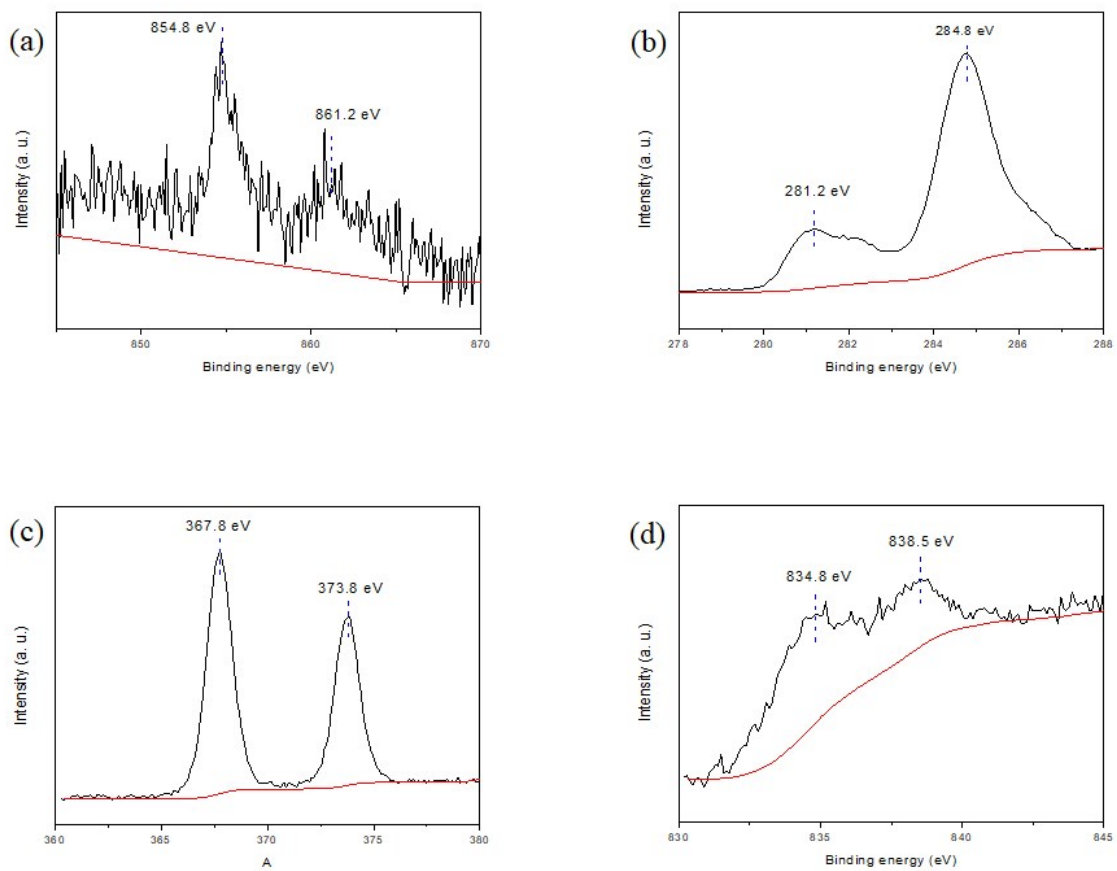

Fig. S14. XPS spectra of (a) Ni 2p of NiFe-400 (b) Ru 3d of RuFe-320 (c) Ag of AgFe-400 and (d) La of LaFe-400



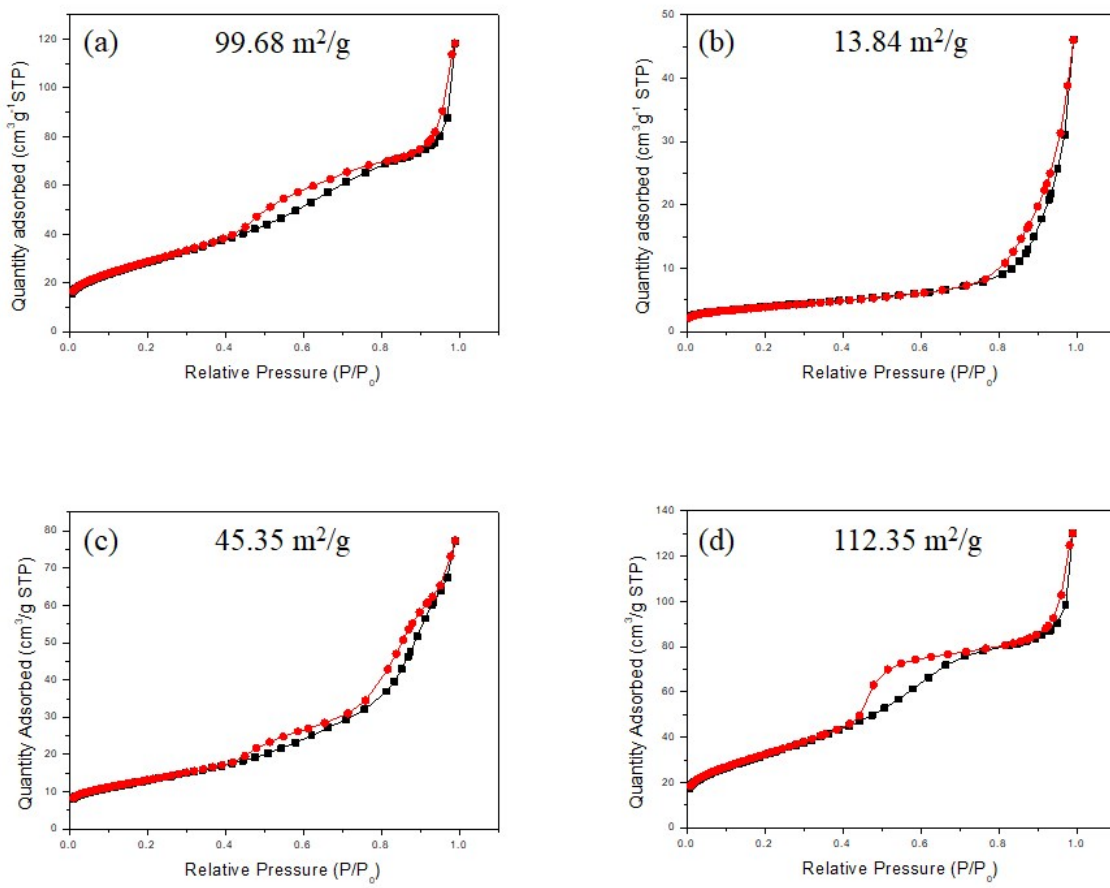

Fig. S15. N<sub>2</sub> adsorption-desorption isotherm of (a) NiFe-400 (b) RuFe-320 (c) AgFe-400 and (d) LaFe-400

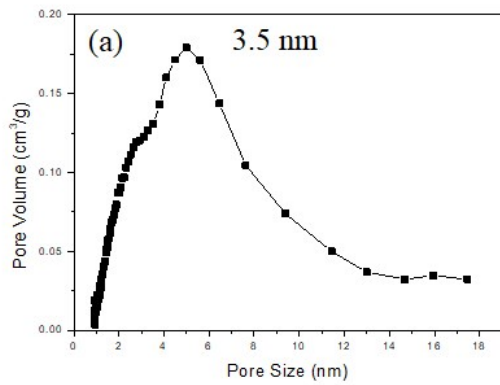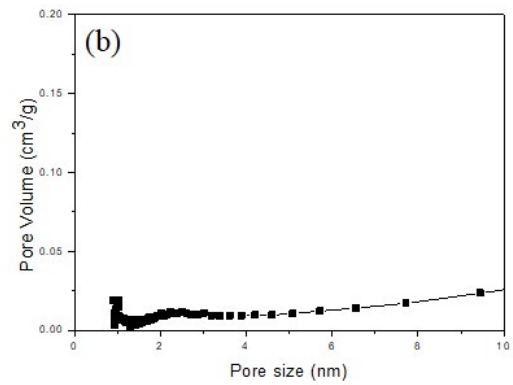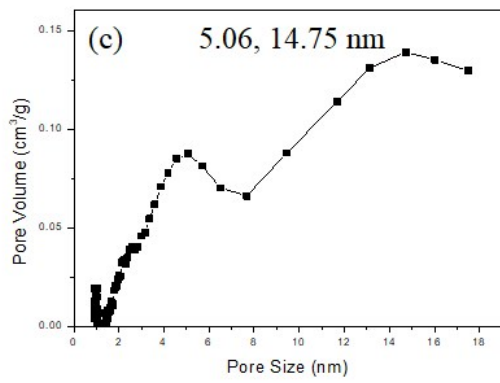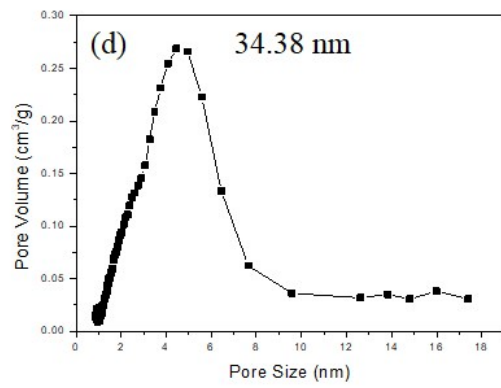

Fig. S16. The pore size distribution of (a) NiFe-400 (b) RuFe-320 (c) AgFe-400 and (d) LaFe-400

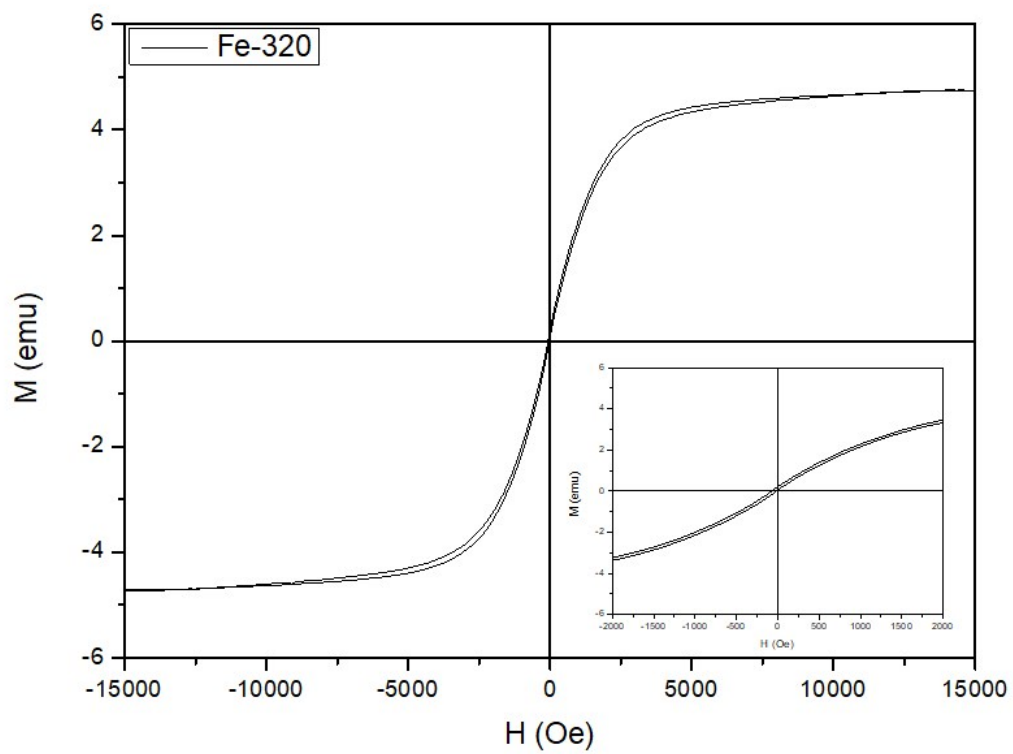

Fig. S17. Magnetic hysteresis loops of Fe-320

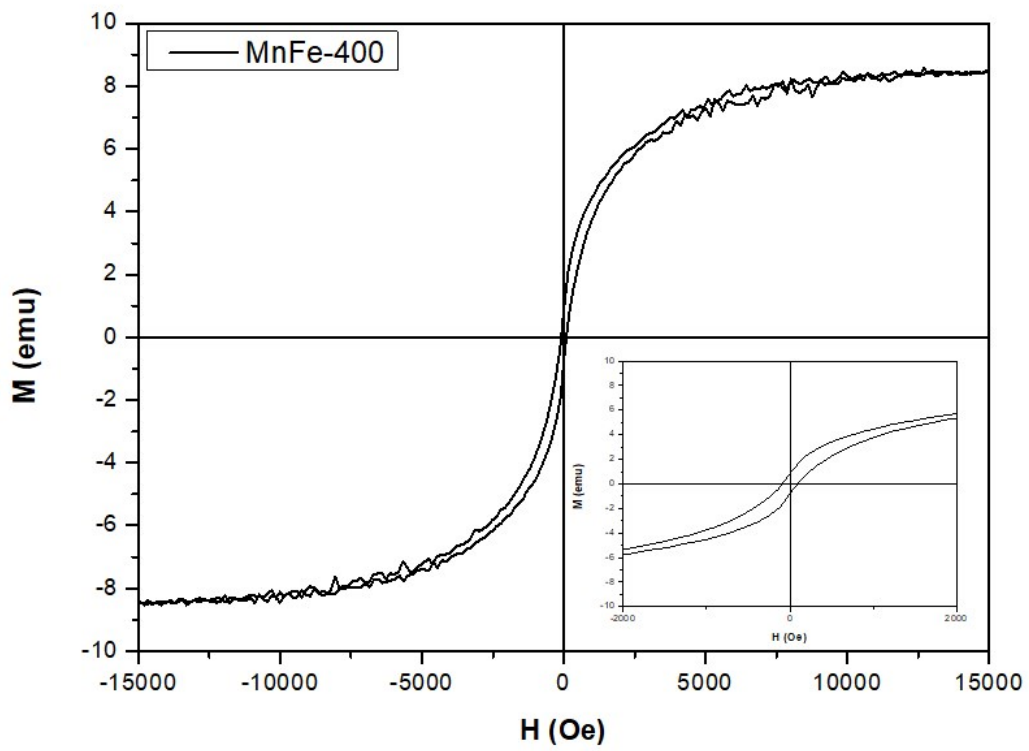

Fig. S18. Magnetic hysteresis loops of MnFe-400

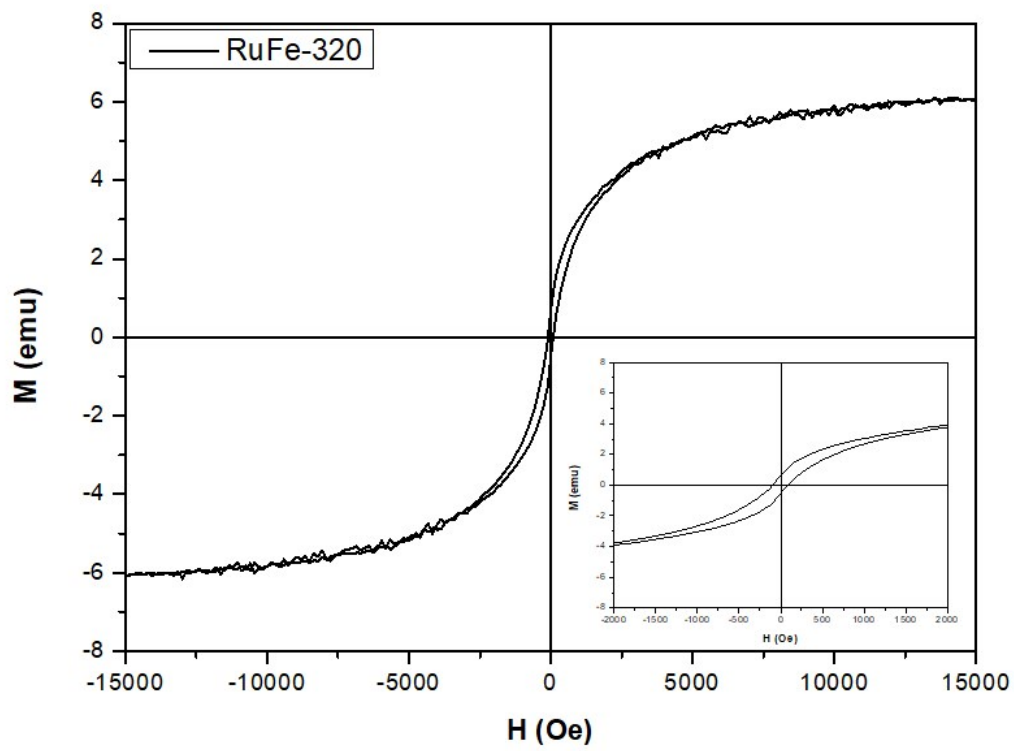

Fig. S19. Magnetic hysteresis loops of RuFe-320

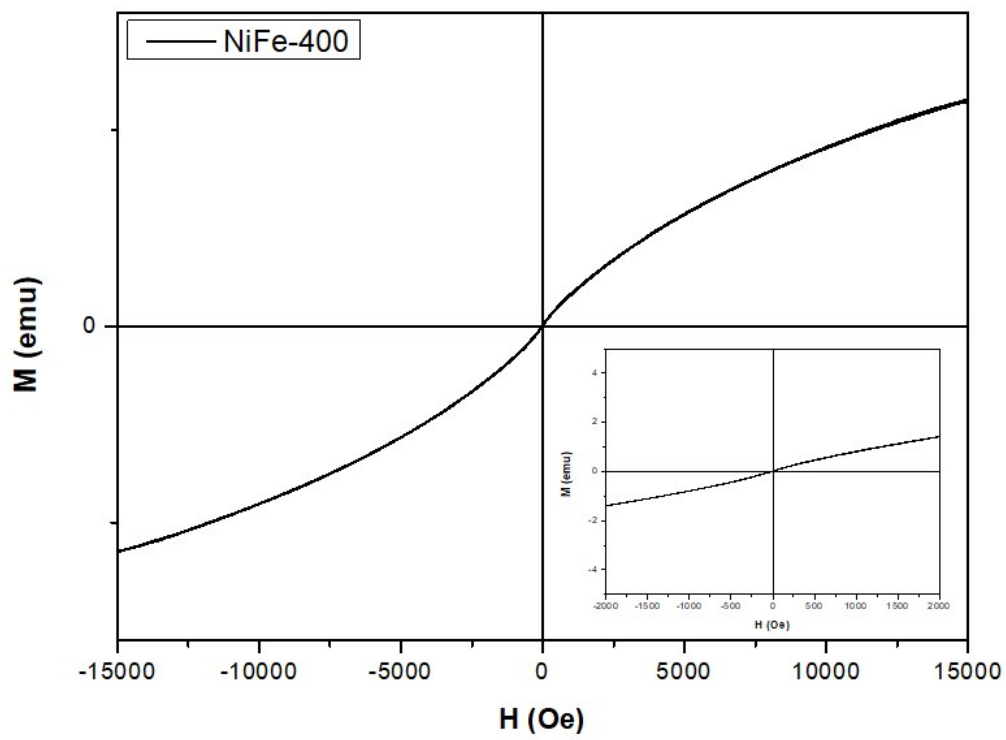

Fig. S20. Magnetic hysteresis loops of NiFe-400



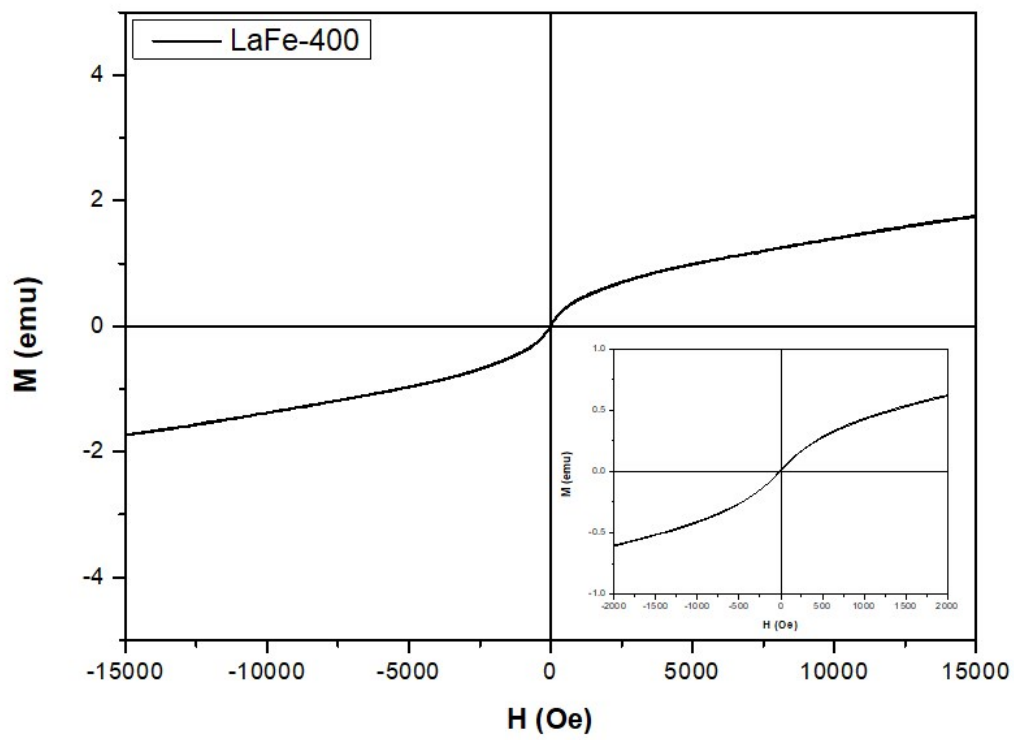

Fig. S21. Magnetic hysteresis loops of LaFe-400

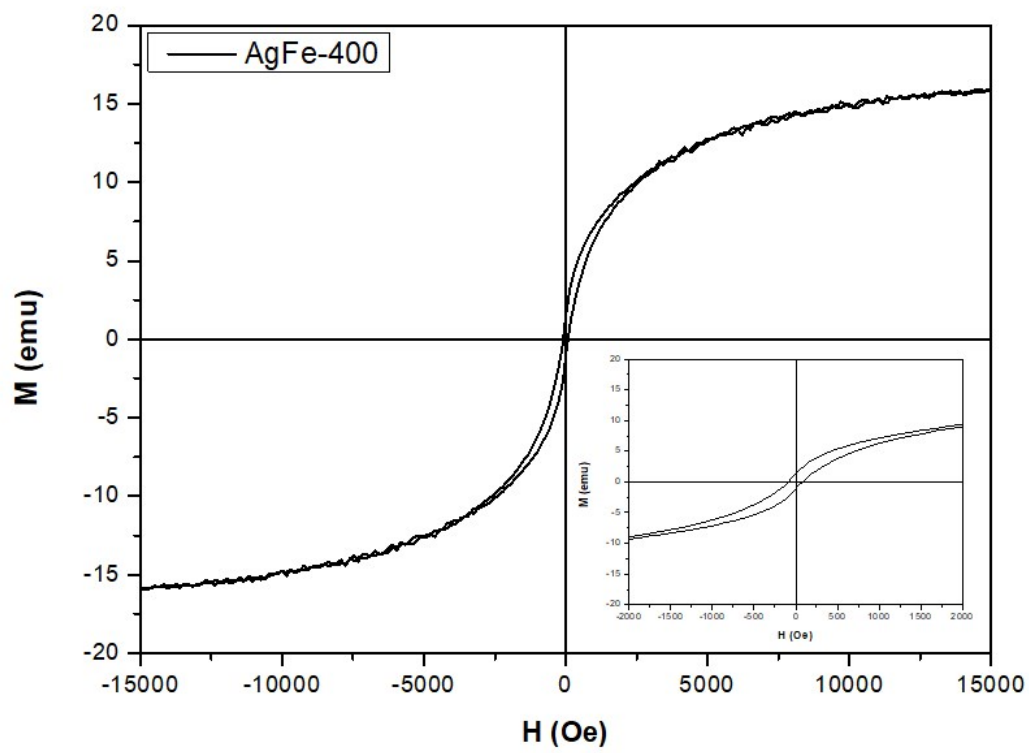

Fig. S22. Magnetic hysteresis loops of AgFe-400

(S1) J. Lee and S.-Y. Kwak, *Cryst. Growth Des.*, **2017**, *17*, 4496–4500
